# Supplementary material for: Bayesian meta-analysis reveals the mechanistic role of slow oscillation-spindle coupling in sleep-dependent memory consolidation
Source: eLife journal article supplement (doi:10.7554/elife.101992), 2024-12-19
Supplement: supp2 [file elife-101992-supp2-v1.pdf]

## Supplementary File 2: Model Diagnostics

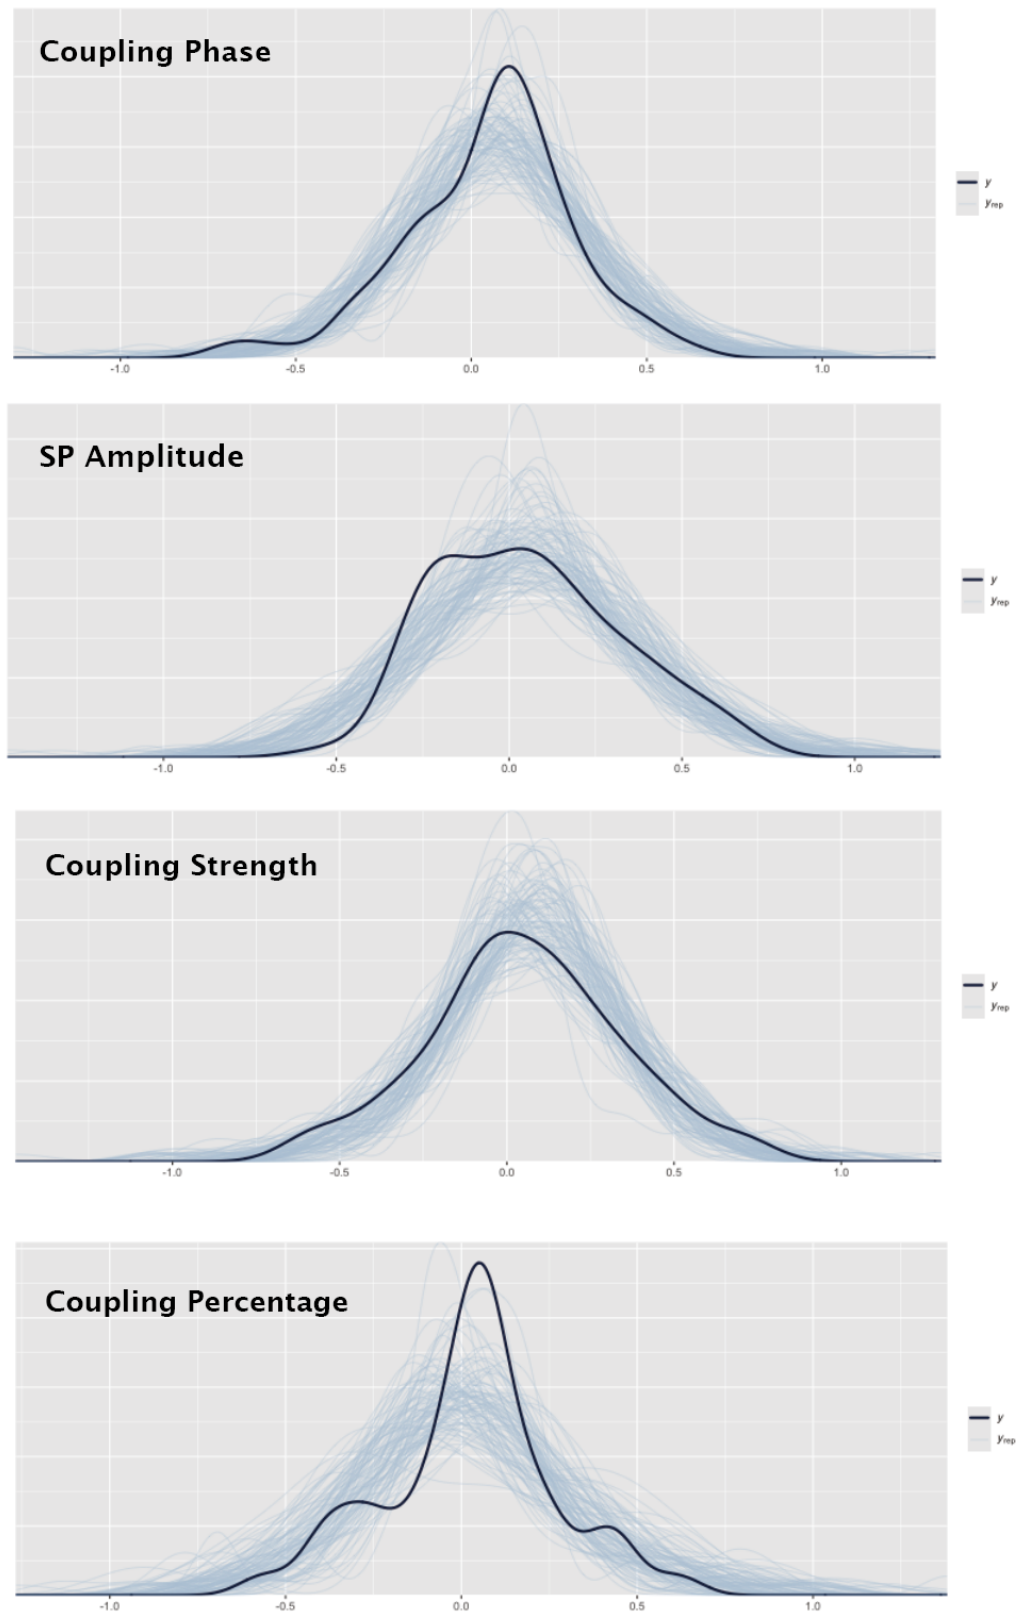

Figure 1: Posterior predictive check of overall models of coupling-memory association measures

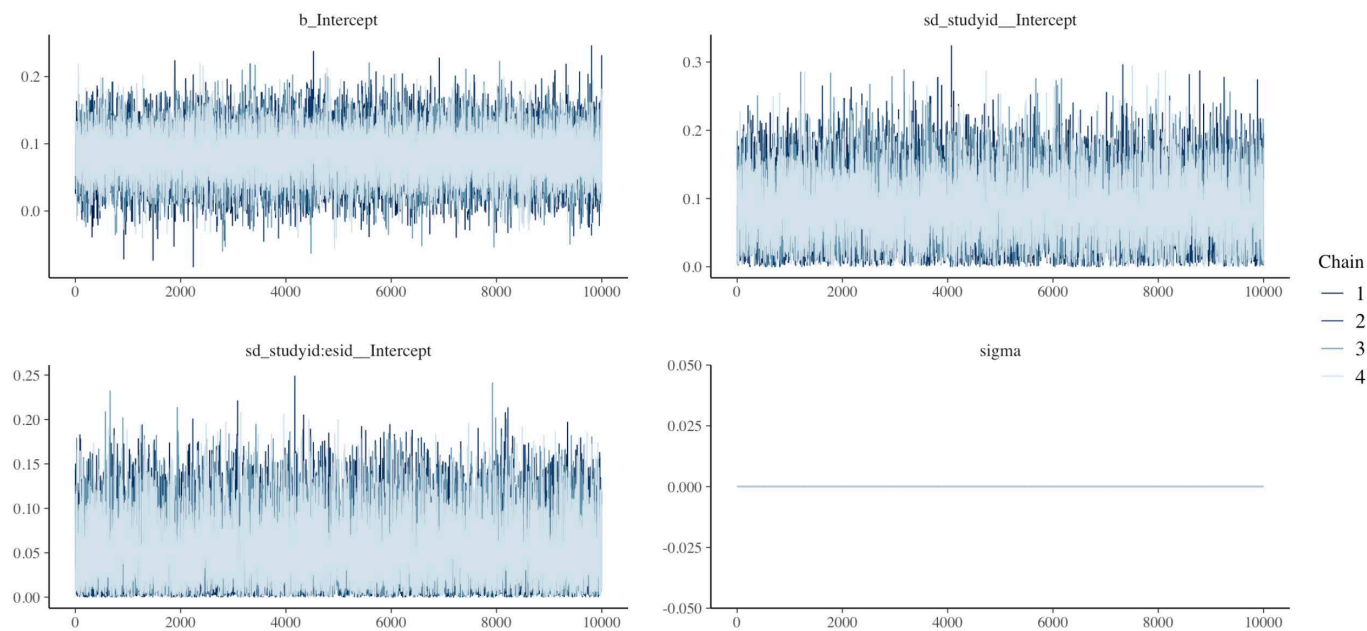

Figure 2: Example of the trace plot used to assess the convergence of models. Well-mixed chains showing no trends or drifts over iterations indicate successful convergence.

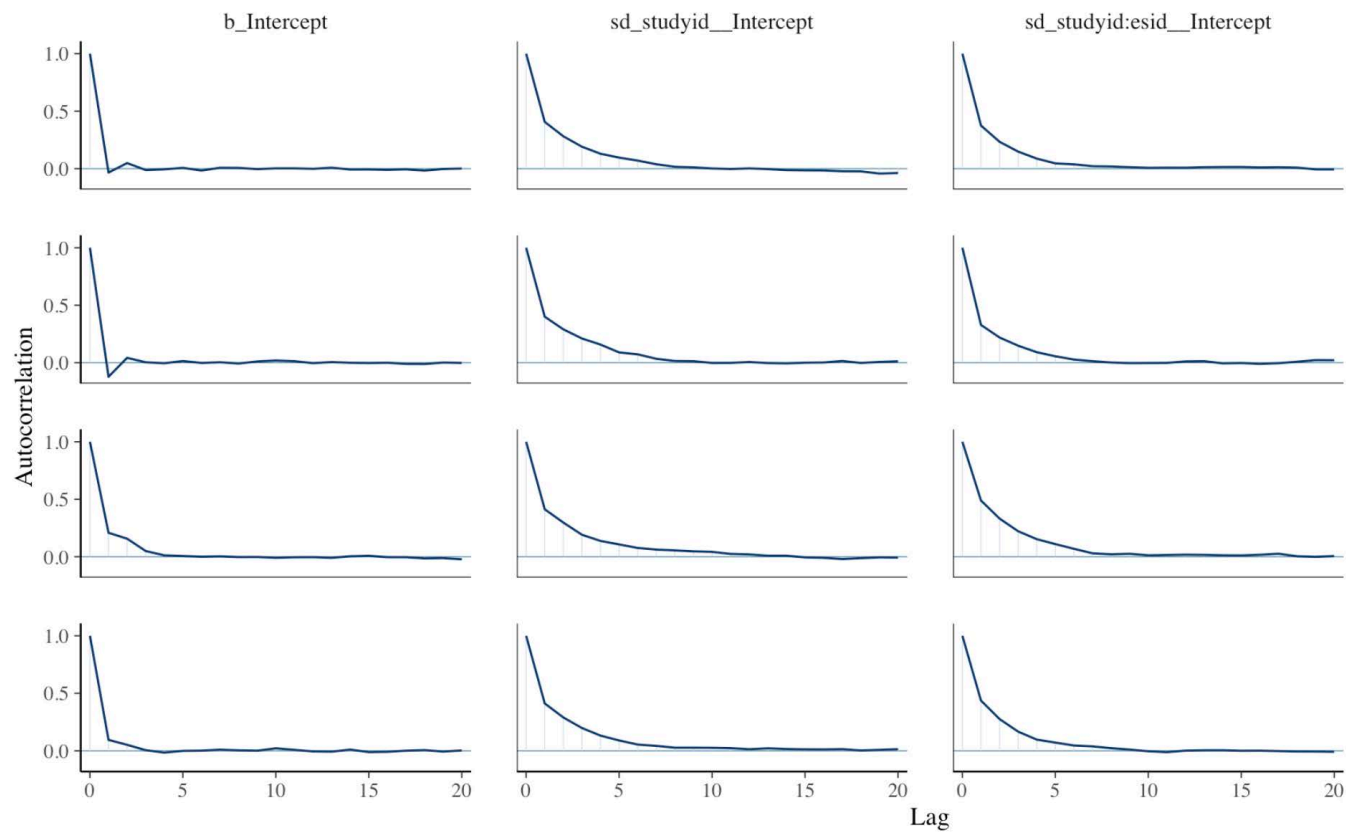

Figure 3: Example of the autocorrelation plot used to assess the independence of samples across iterations, with a rapid decay of autocorrelation indicating efficient sampling and low within-chain redundancy.
