# Supplementary material for: Bayesian meta-analysis reveals the mechanistic role of slow oscillation-spindle coupling in sleep-dependent memory consolidation
Source: eLife journal article supplement (doi:10.7554/elife.101992), 2024-12-19
Supplement: supp5 [file elife-101992-supp5-v1.pdf]

## Supplementary File 5: Frequentist analysis

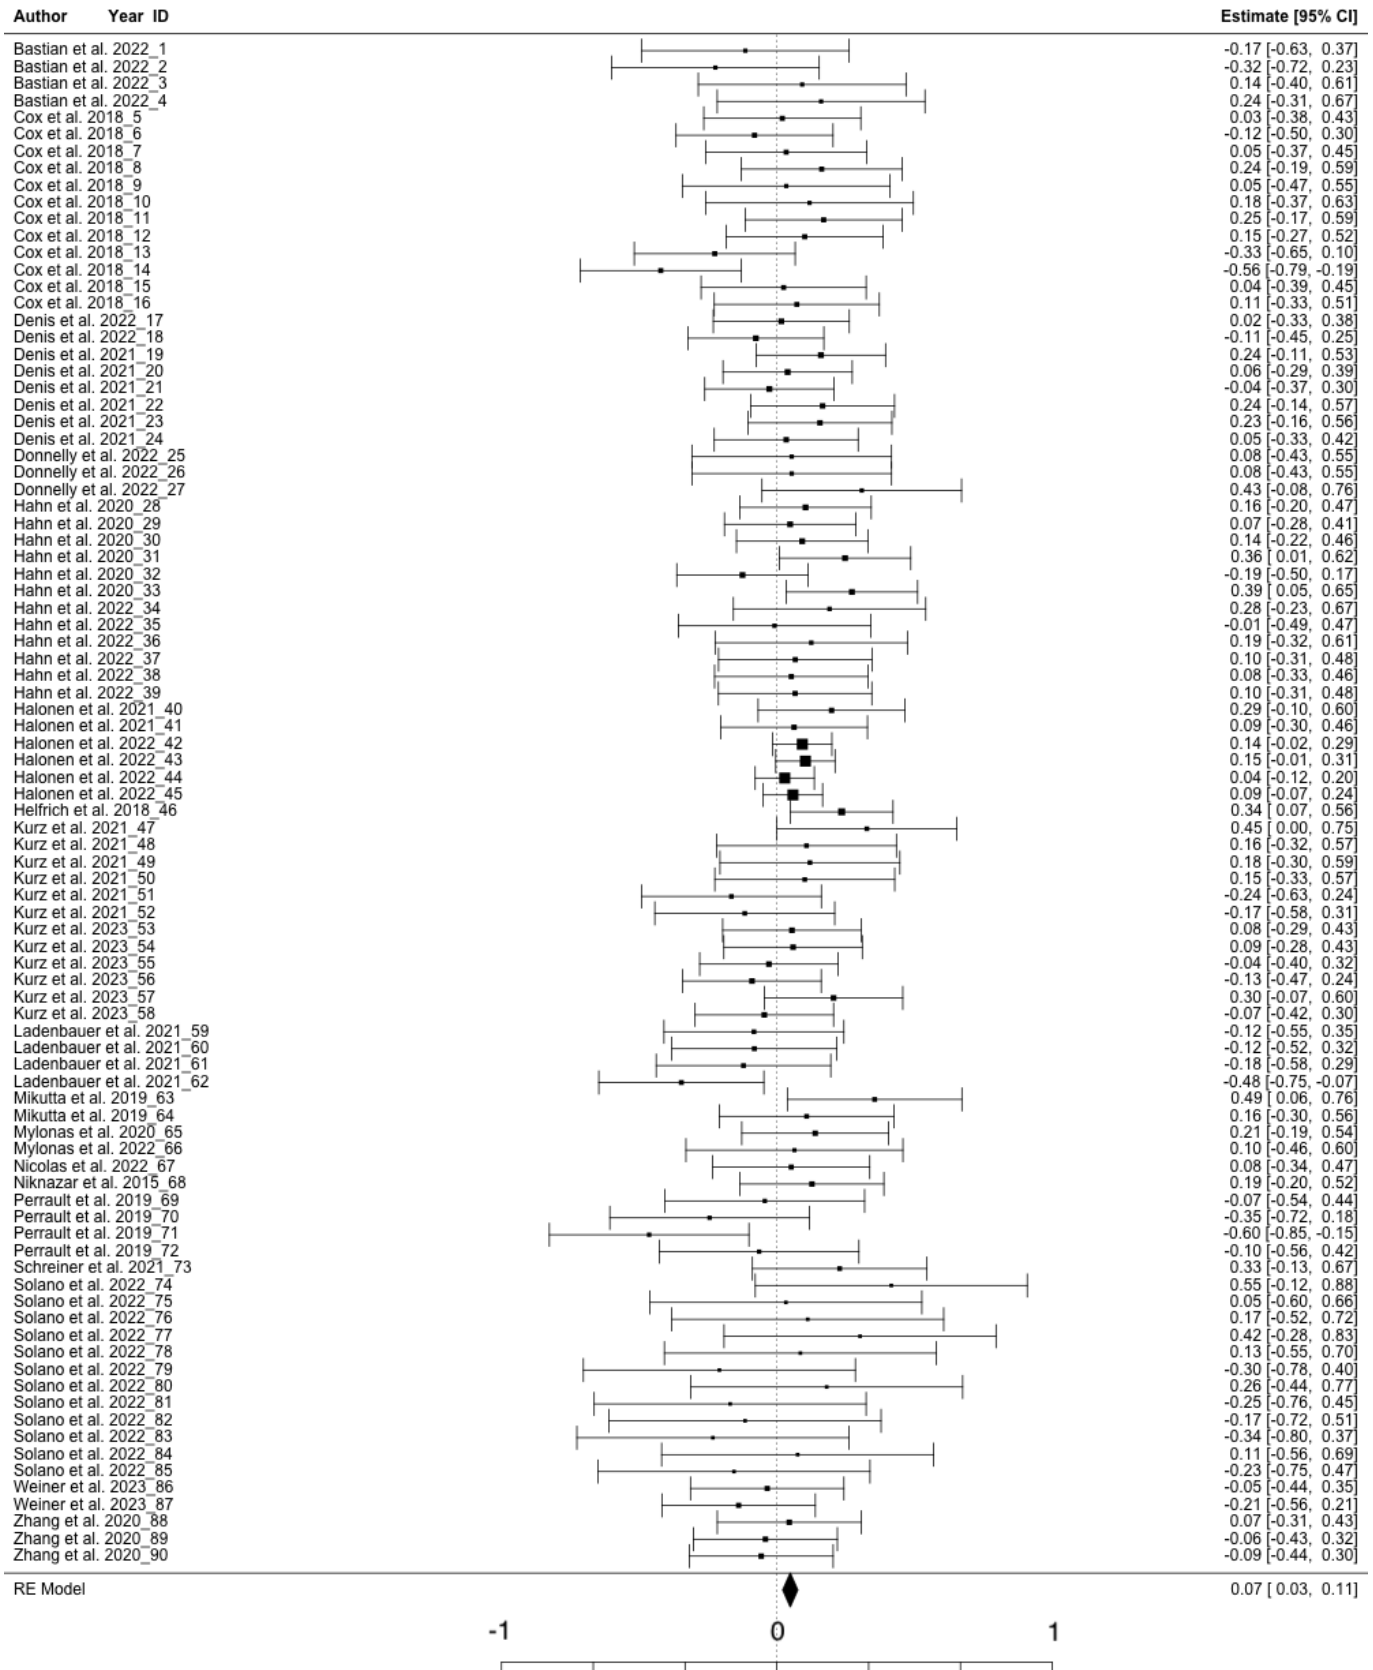

Figure 1: Coupling phase frequentist forest plot

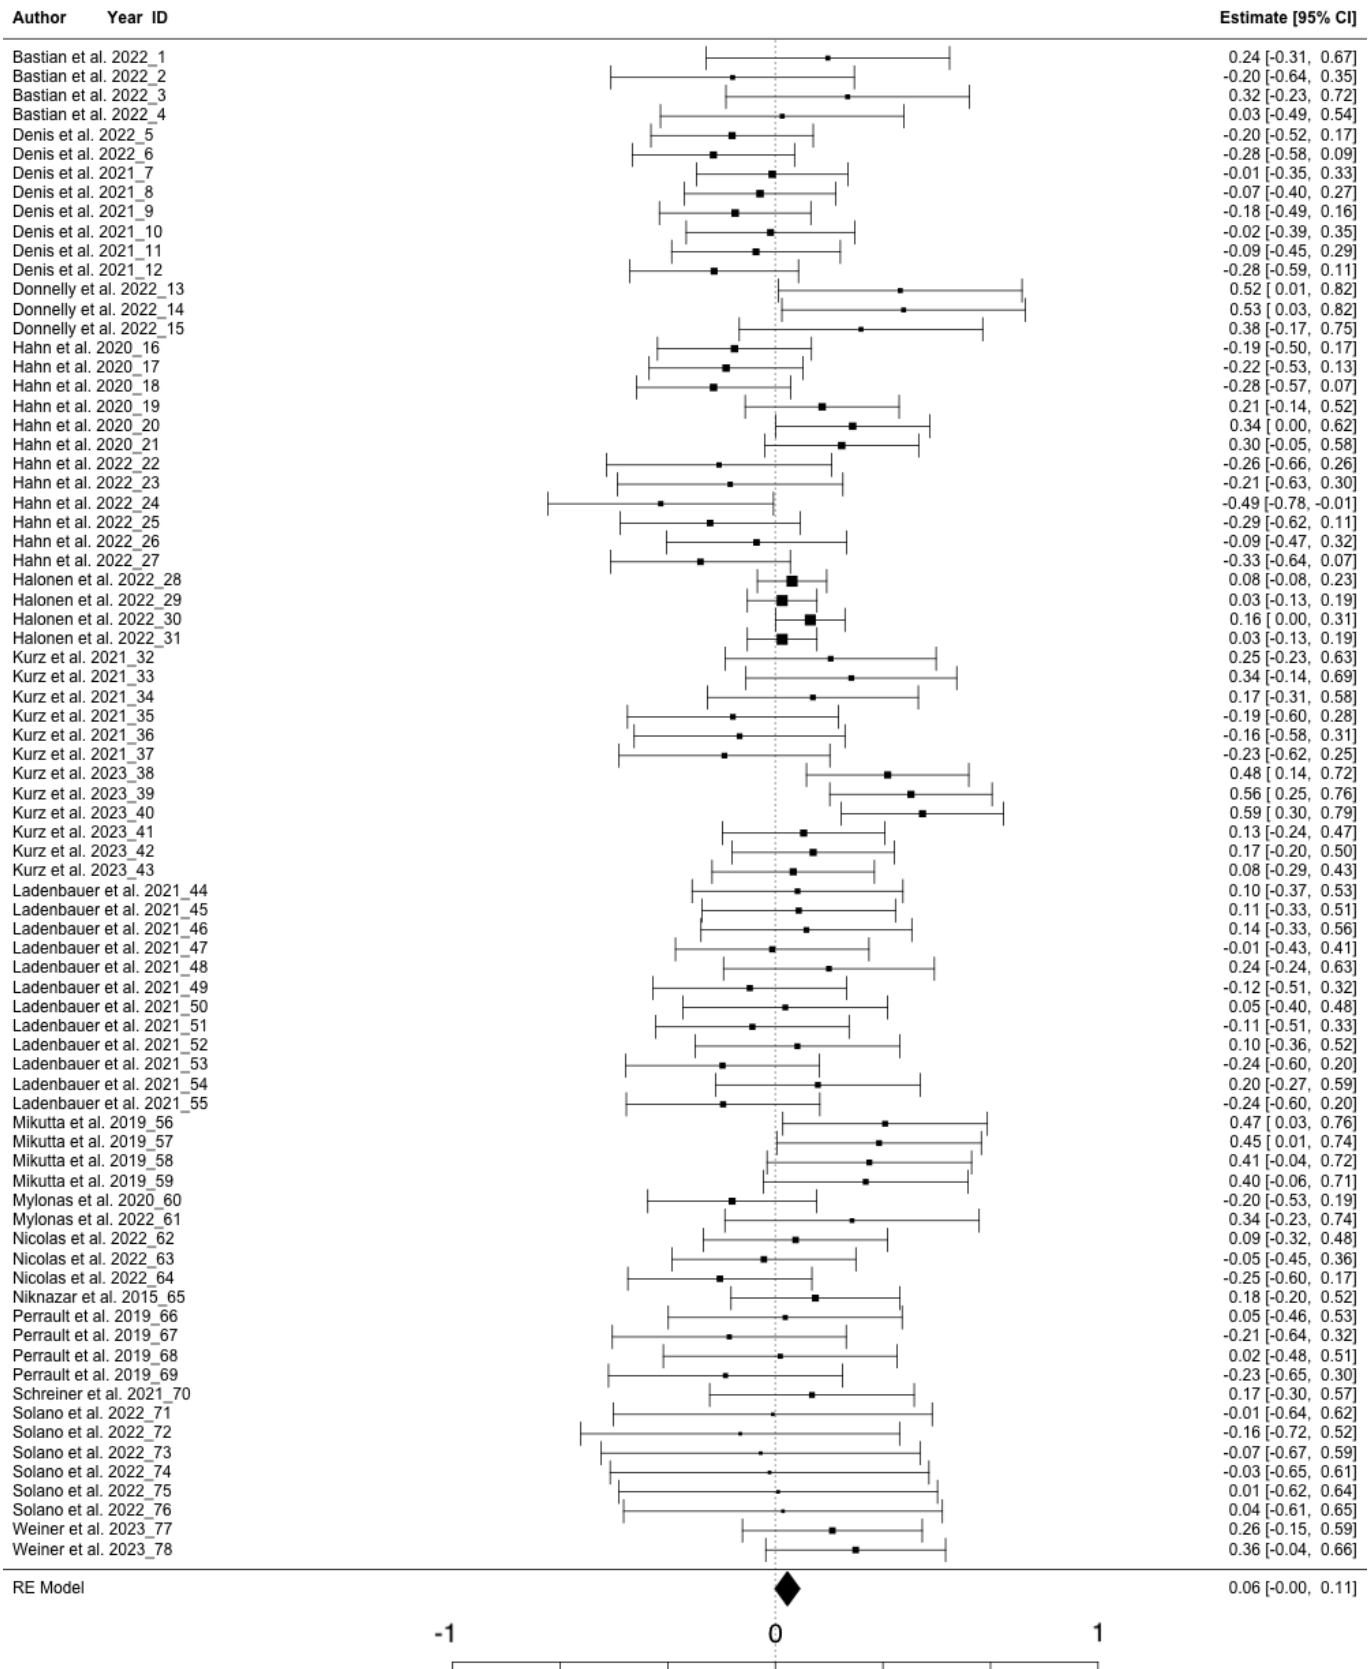

Figure 2: SP amplitude frequentist forest plot

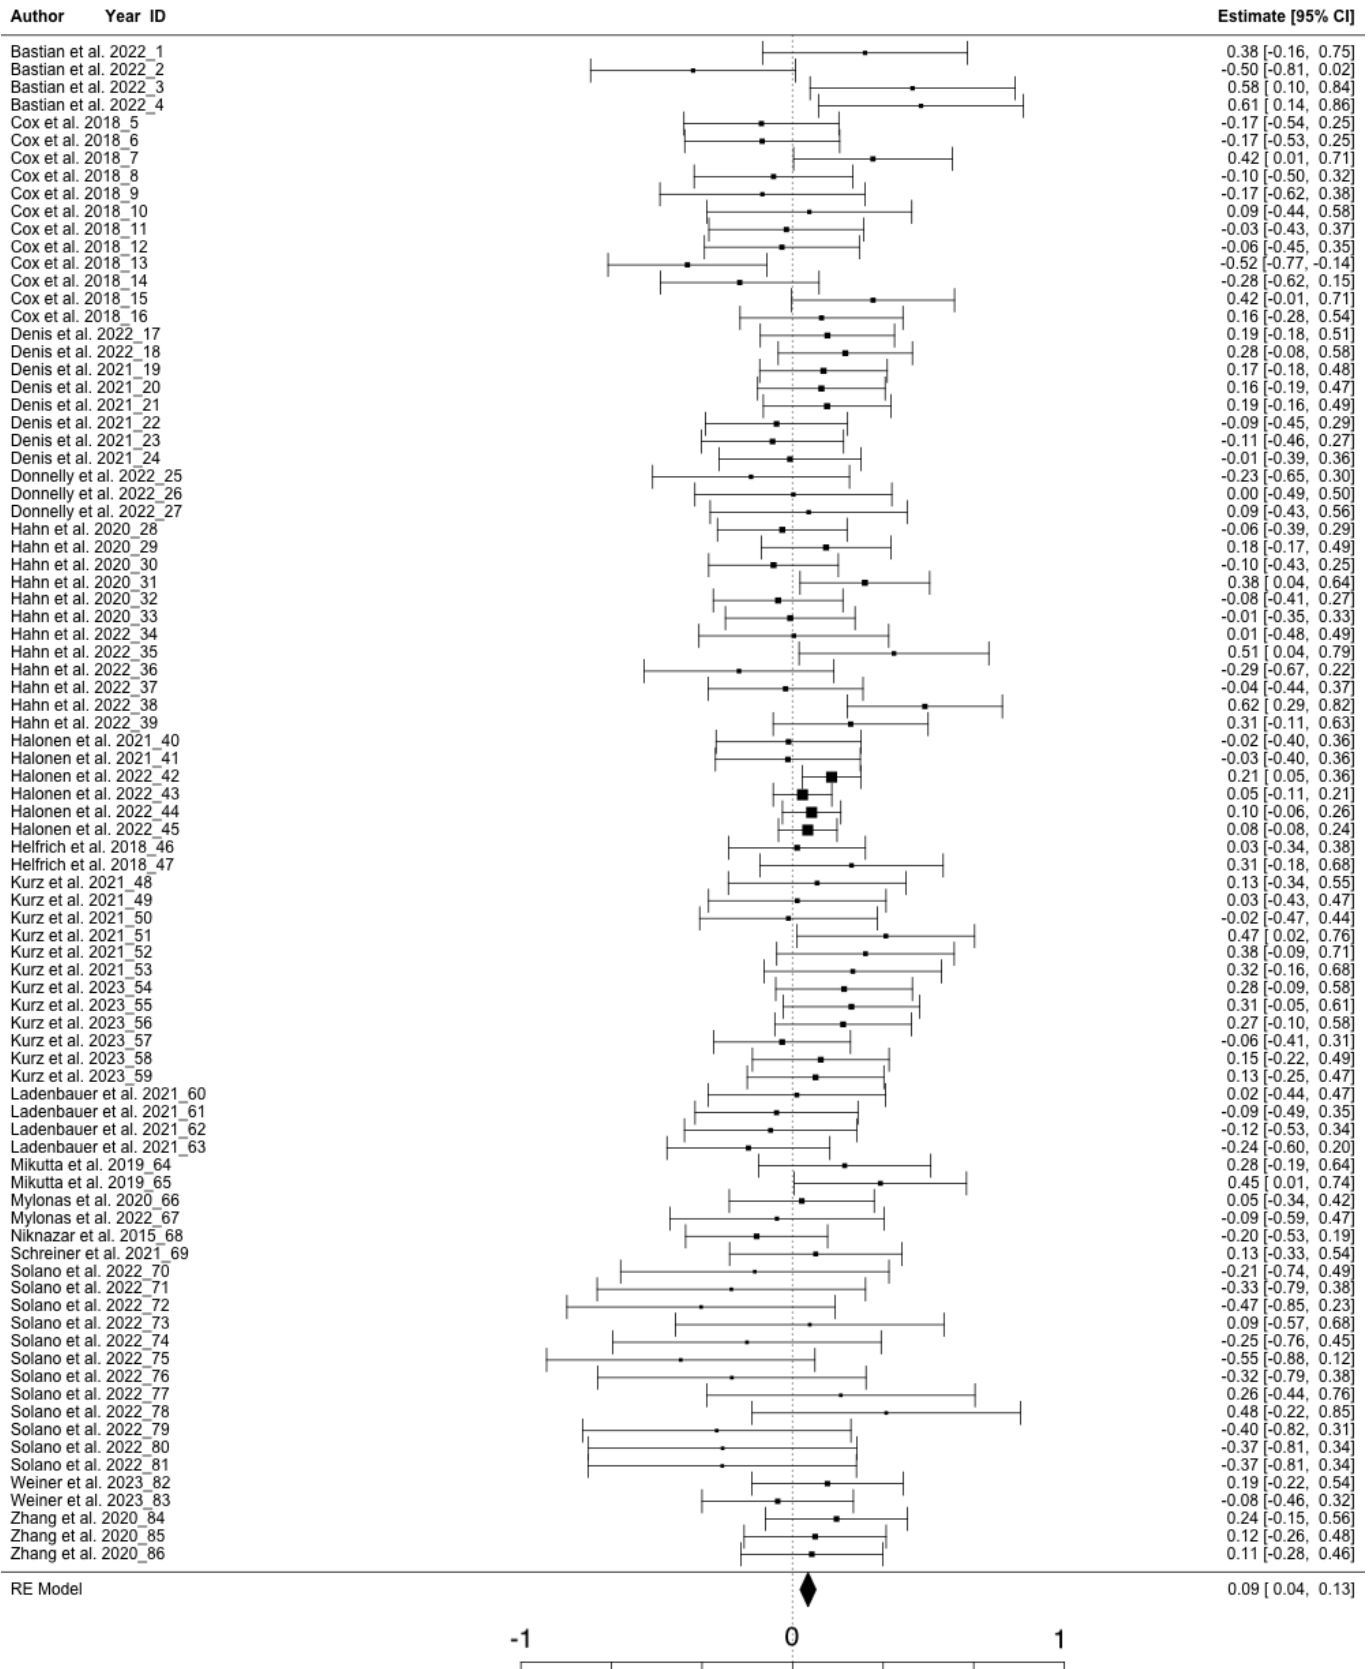

Figure 3: Coupling strength frequentist forest plot

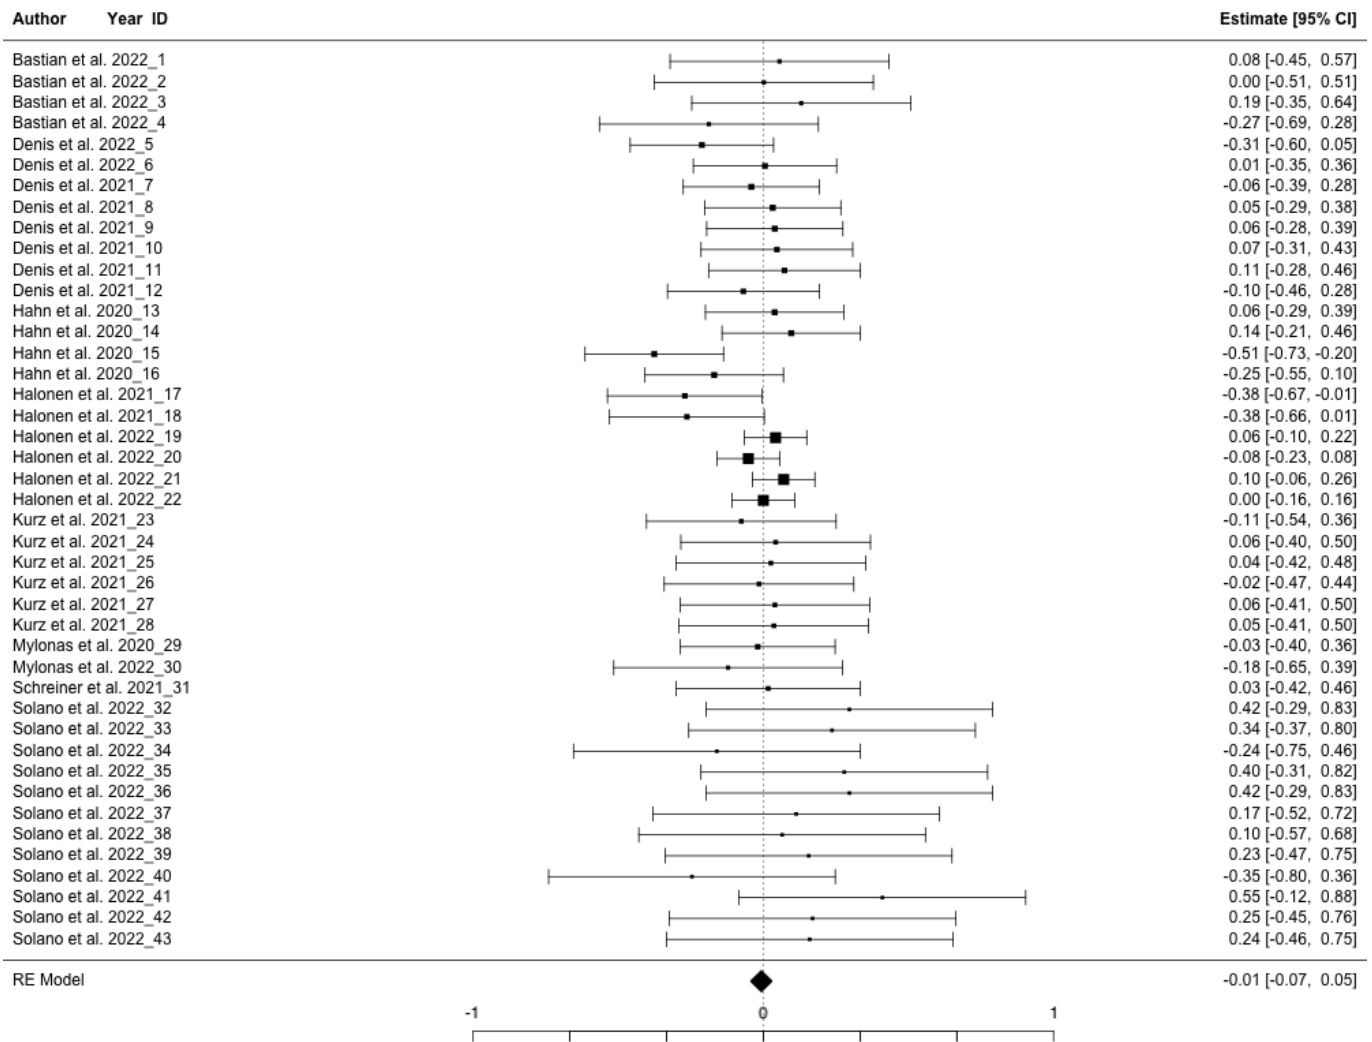

Figure 4: Coupling percentage frequentist forest plot
