# Supplementary material for: Bayesian meta-analysis reveals the mechanistic role of slow oscillation-spindle coupling in sleep-dependent memory consolidation
Source: eLife journal article supplement (doi:10.7554/elife.101992), 2024-12-19
Supplement: supp6 [file elife-101992-supp6-v1.pdf]

## Supplementary File 6: Posterior distribution of moderators

Coupling Phase Moderator Posterior Distribution

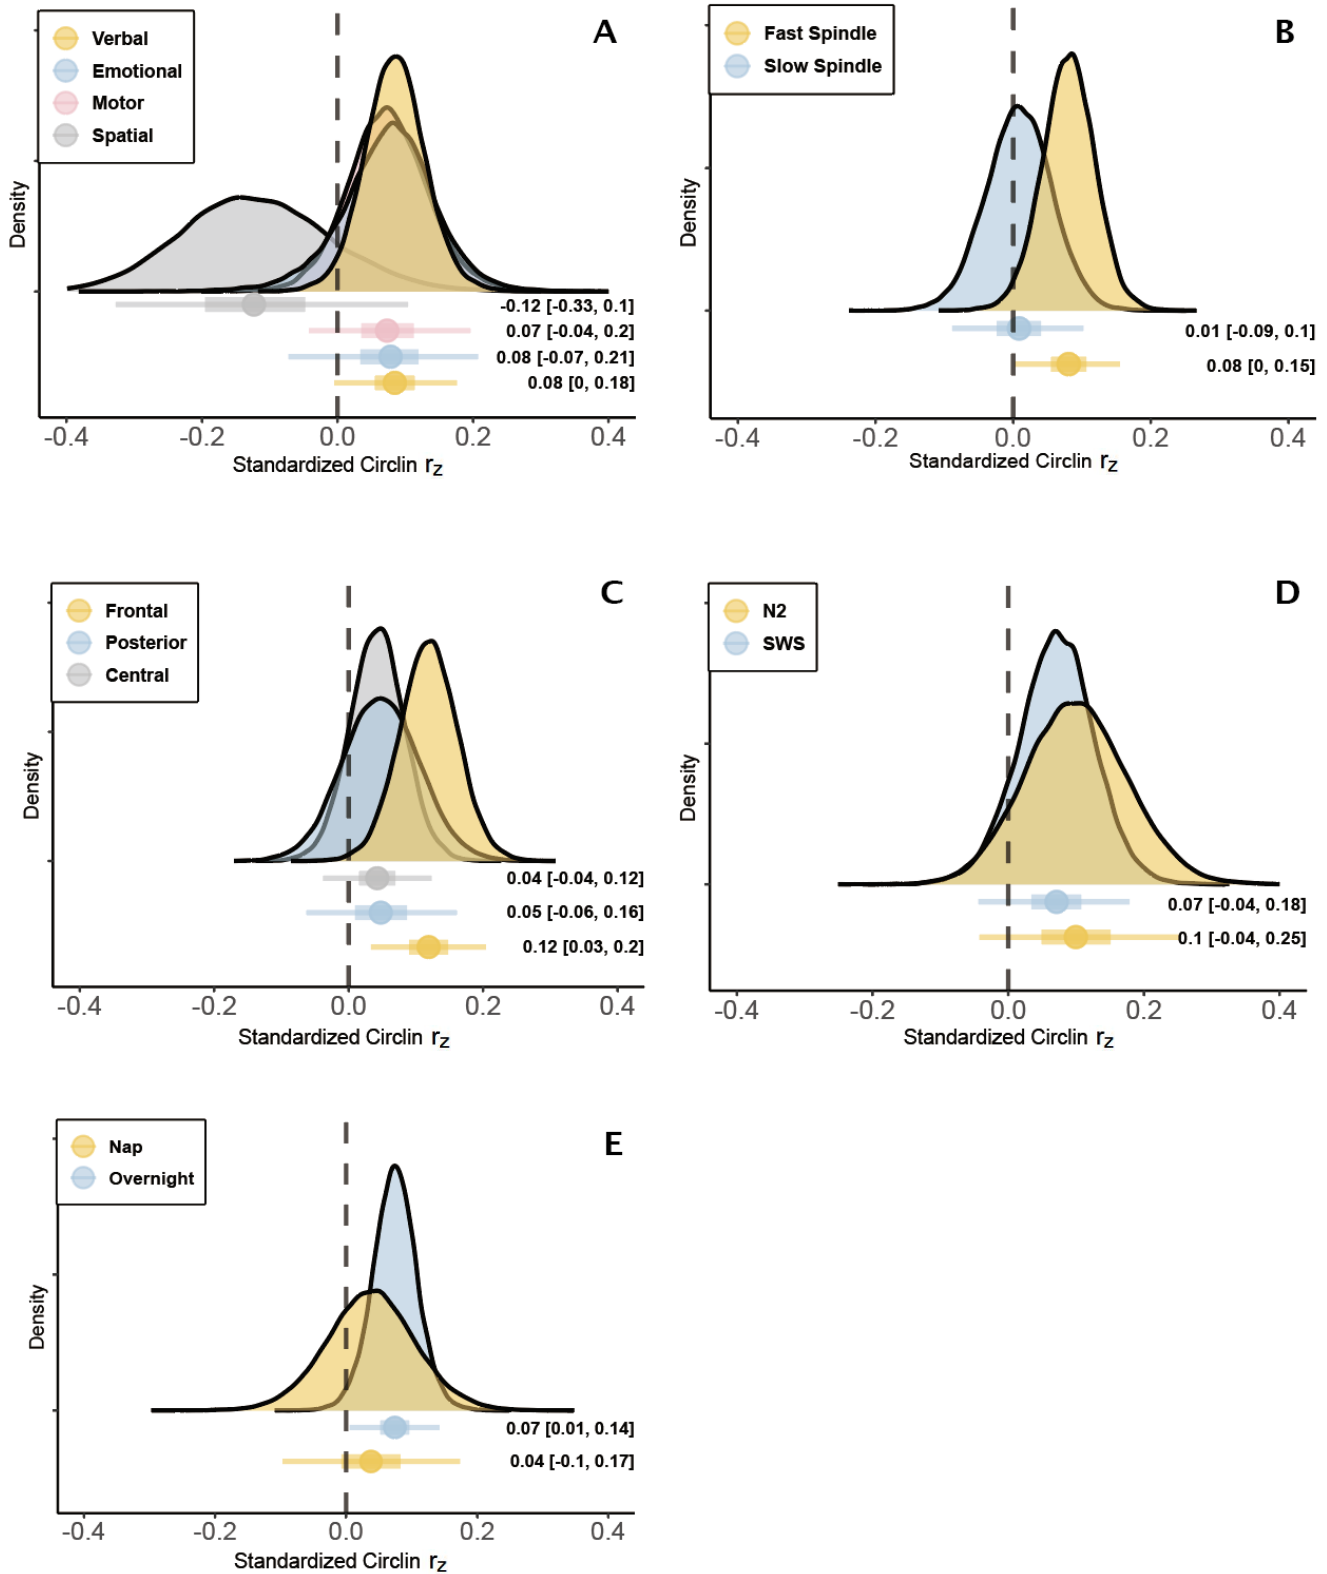

Figure 1: Posterior distributions of moderation factors of the coupling phase

# SP Amplitude Moderator Posterior Distribution

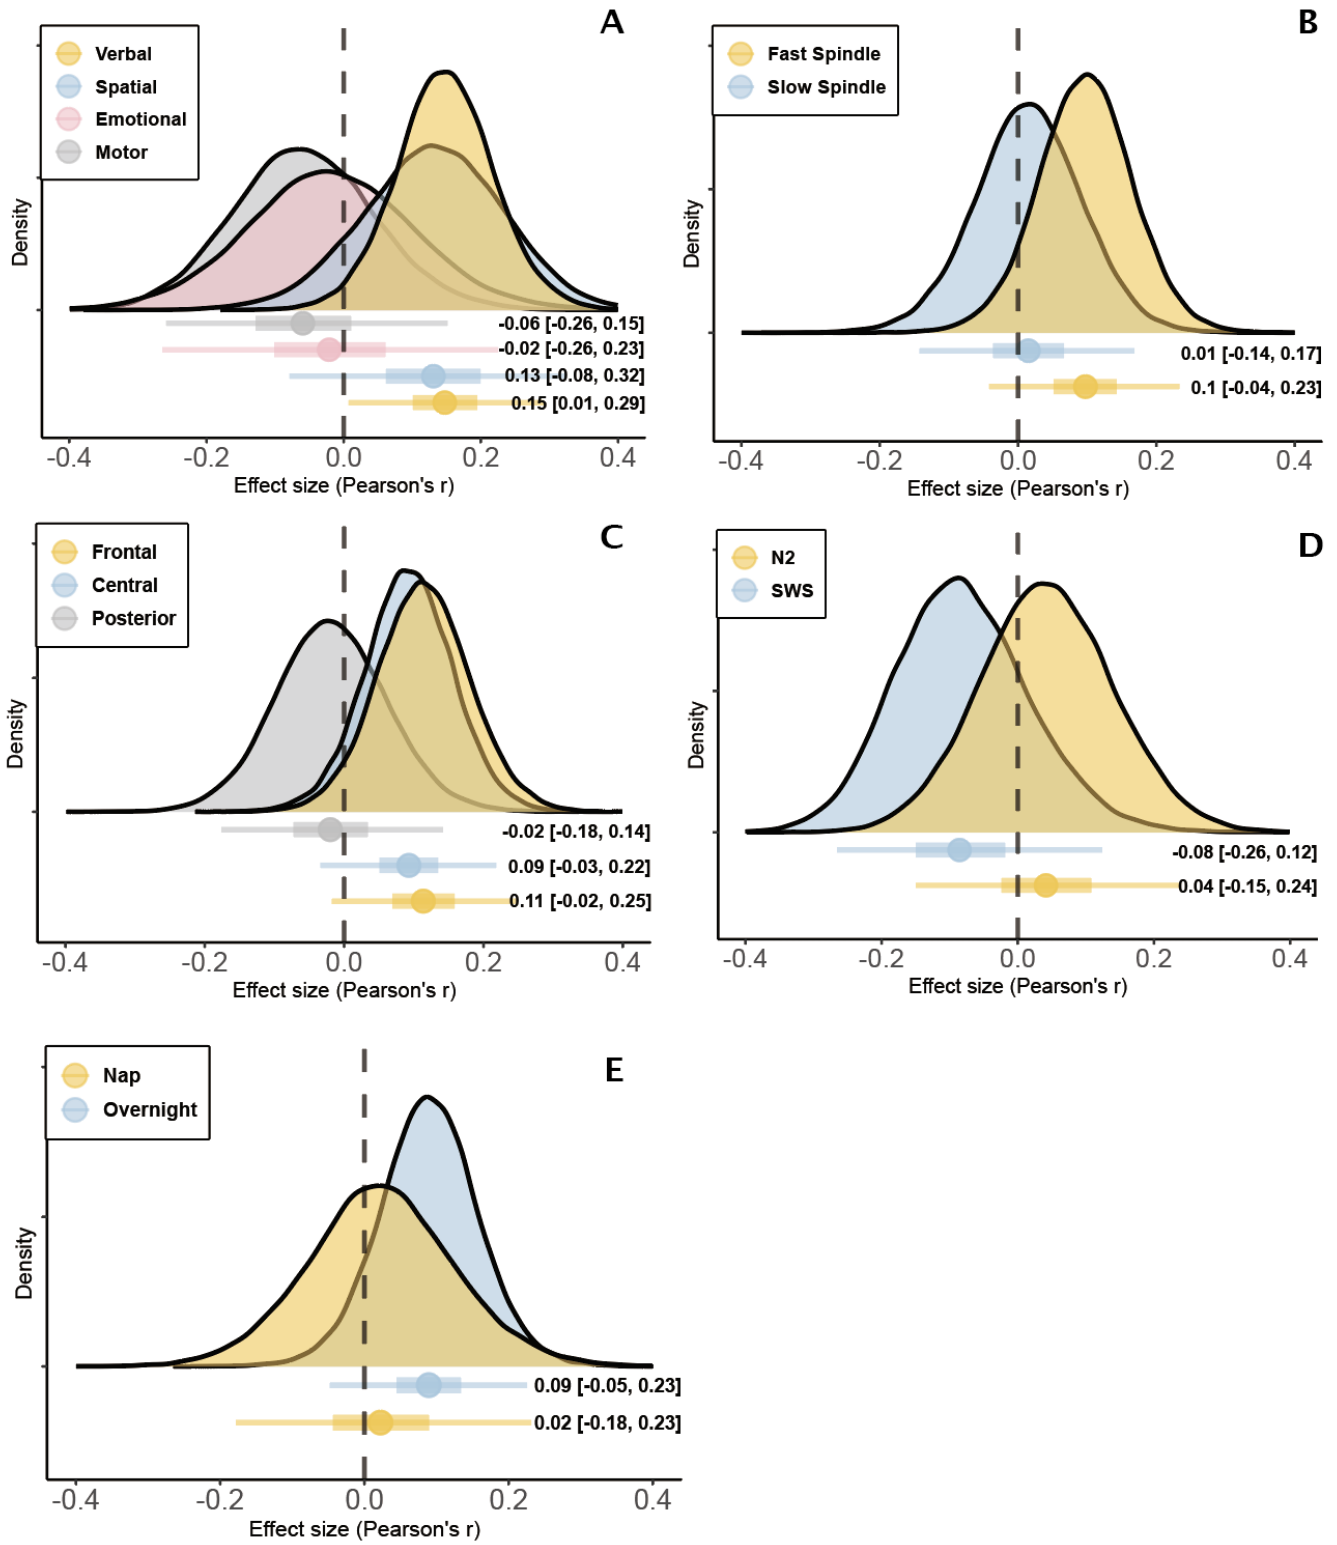

Figure 2: Posterior distributions of moderation factors of the SP amplitude

### Coupling Strength Moderator Posterior Distribution

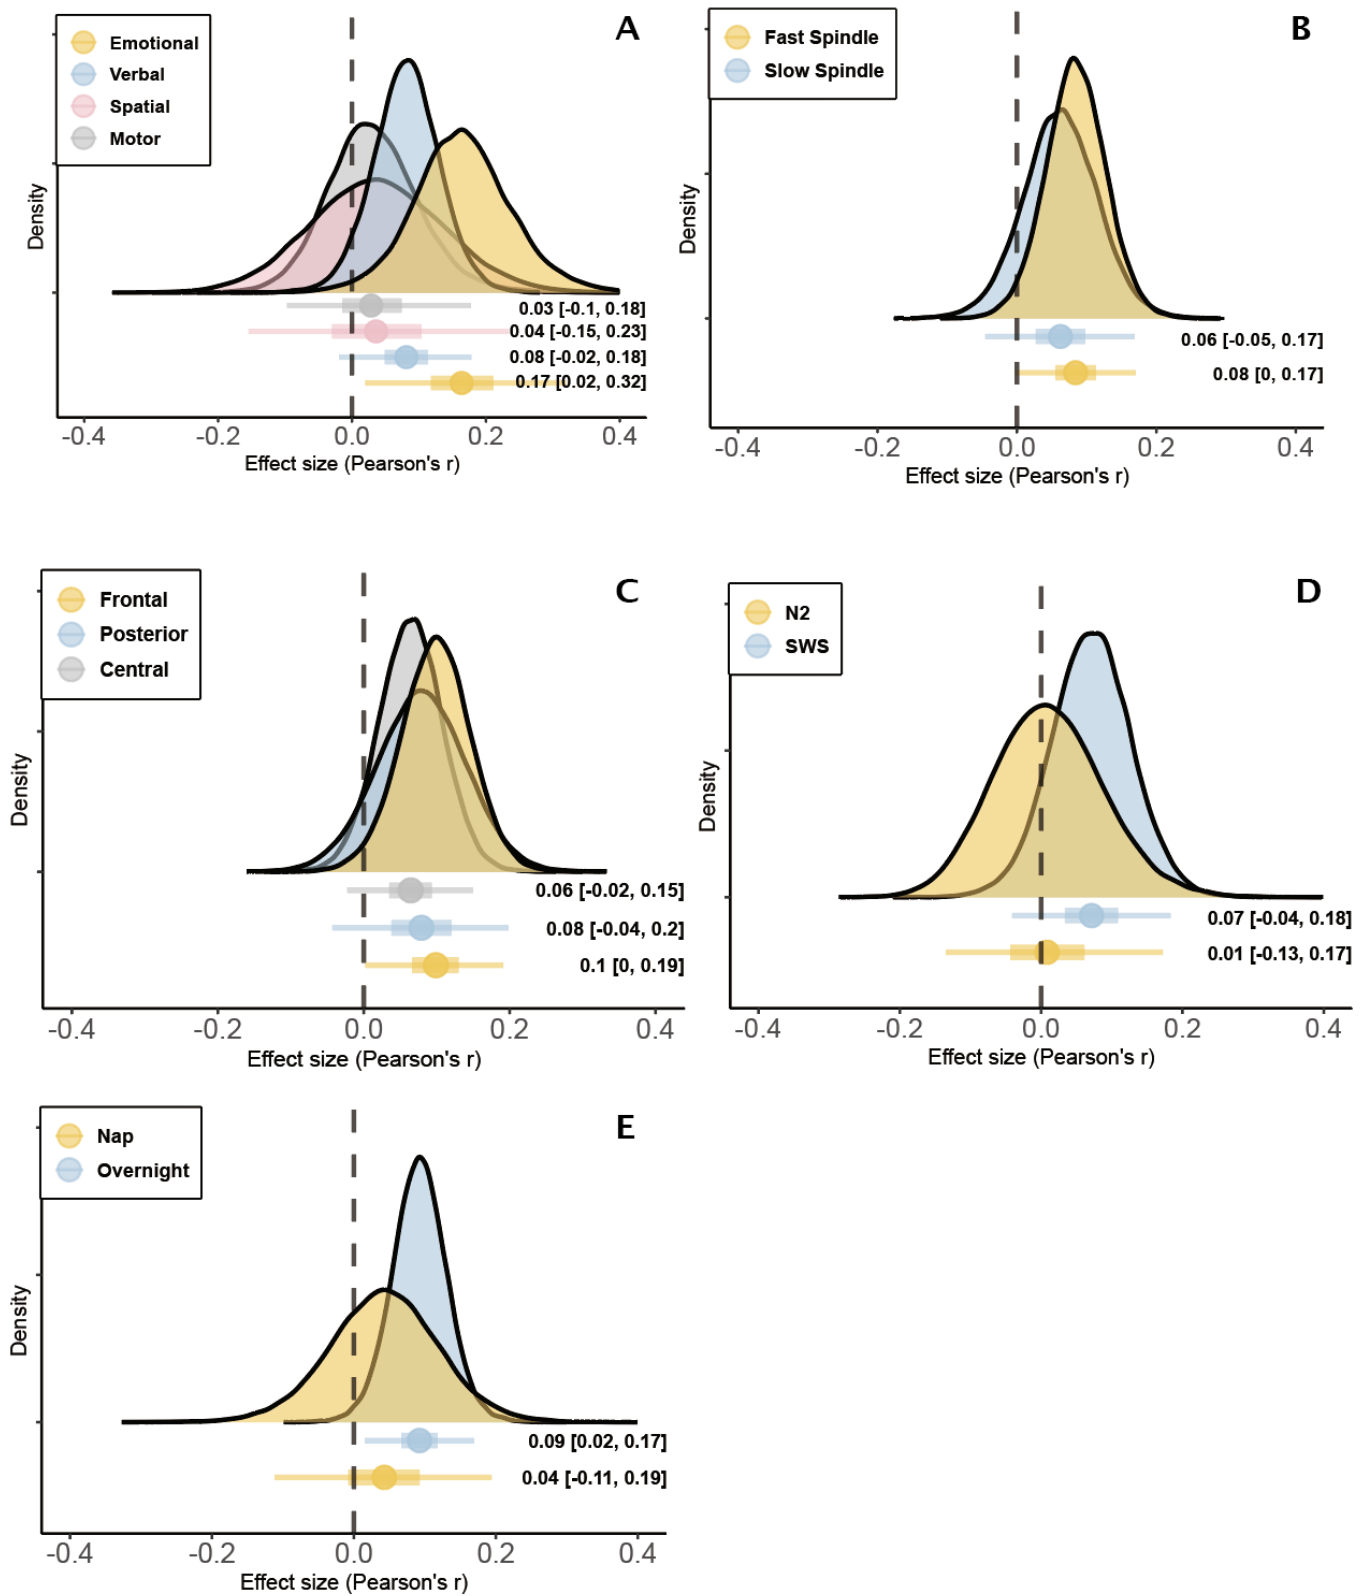

Figure 3: Posterior distributions of moderation factors of the coupling strength

# Coupling Percentage Moderator Posterior Distribution

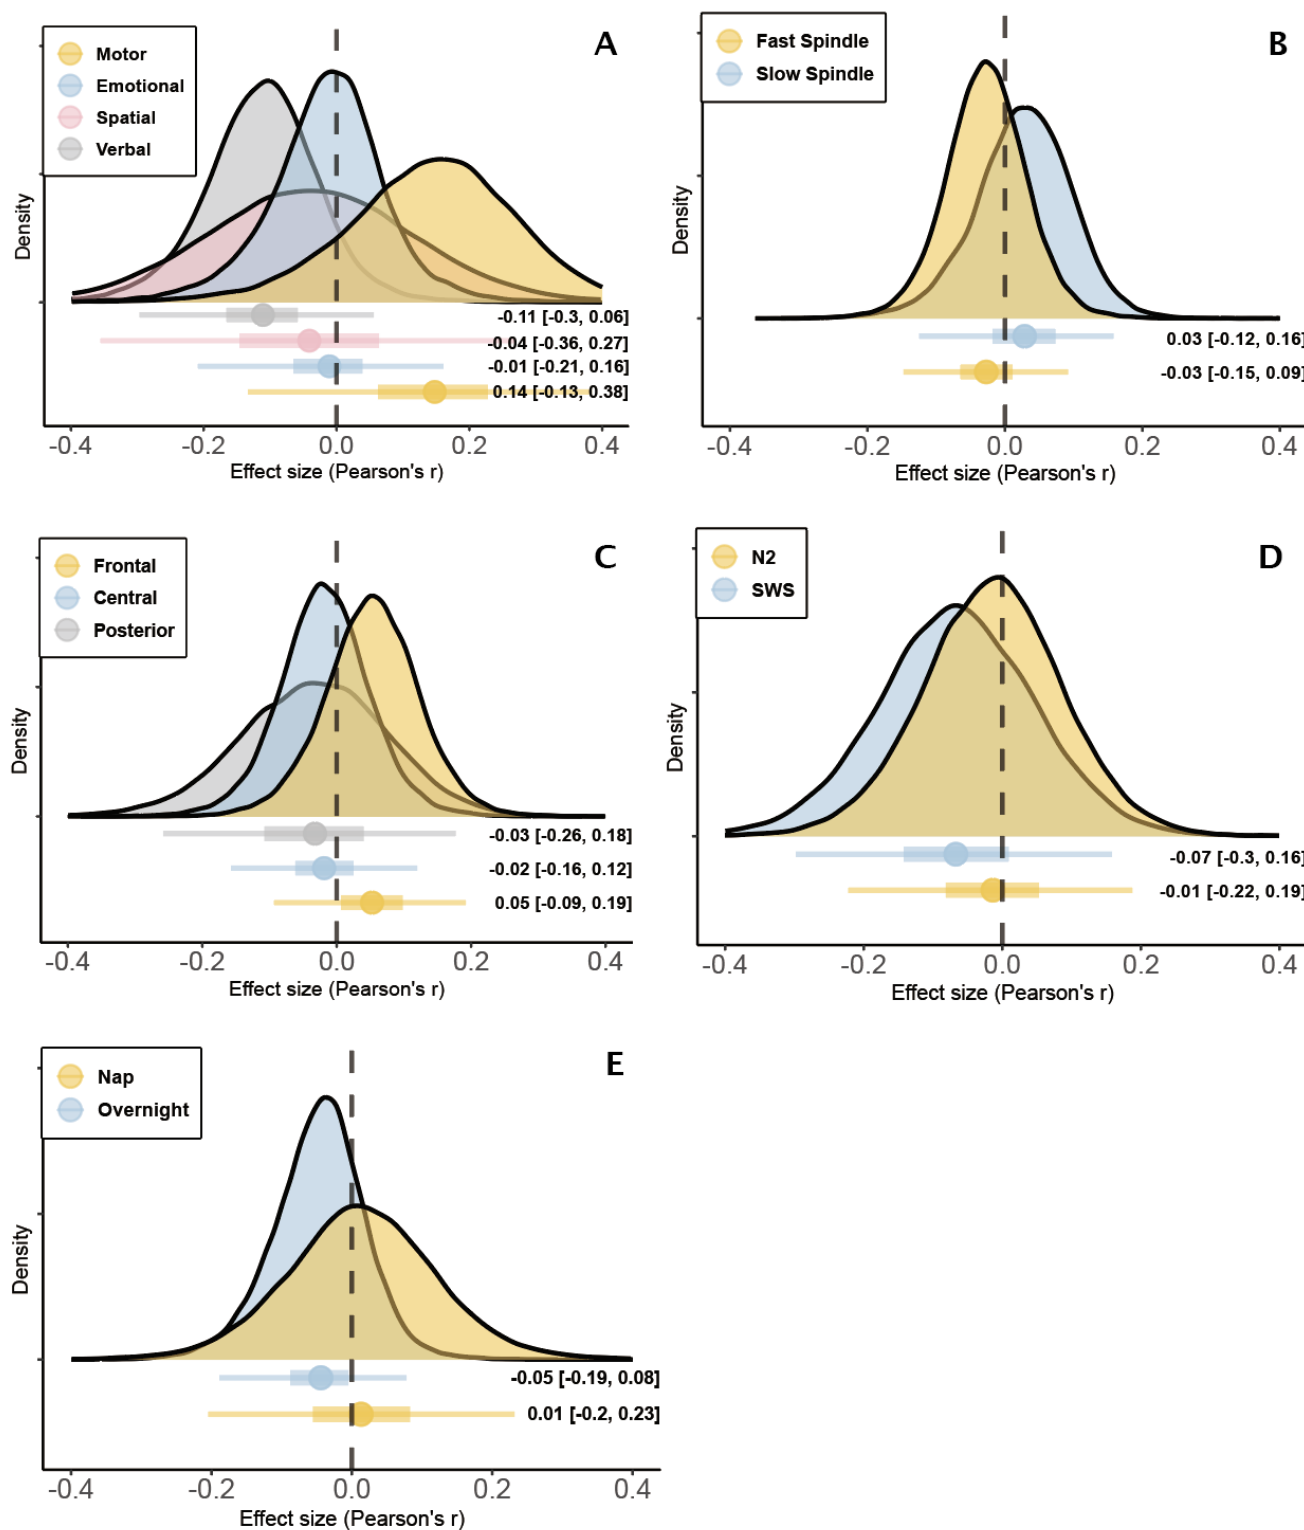

Figure 4: Posterior distributions of moderation factors of the coupling percentage

Notes. The vertical line reflects the mean correlation coefficient under the null hypothesis. Colored dots and error bars reflect the mean and 95% credible intervals of each posterior distribution.
